# Supplementary material for: Dynamic Inconsistency in Food Choice: Experimental Evidence from Two Food Deserts
Source: Oxford University Press journal article supplement (doi:10.1093/restud/rdz030), 2019-05-16
Supplement: rdz030_supplementary_data.zip [file rdz030_supplementary_data.zip]

Sadoff et al. (2019) Supplementary Materials  
readme.pdf

This folder contains the online appendix for Sadoff et al. (2019) and a zipped folder 'Datafortheweb.zip'. 'Datafortheweb.zip' contains all Stata data files and do files for producing the analysis and figures of Sadoff et al. (2019). Also included is file 'Simulation for Model Fit.R', and R-file for creating Figure 4 of the text.

The files included in the sub-folder 'Data Files' are the 'dataset.dta' and 'speed.dta' which are the primary data for the manuscript and additional data on the speed of food consumption in one study location.

The files included in the sub-folder 'Do Files' are 'doanalysis.do', which prepares the log file and calls all subsequent do file; 'datasetup.do', which prepares the data for analysis; 'dotables.do' which creates and logs all tables in the manuscript and relevant statistics; 'dofigures.do' which creates all figures in the manuscript and logs relevant statistics; 'robustness.do' which provides the robustness analysis not included in a table or figure; 'consumptionspeed.do' which provides additional statistics on the reported speed of consumption of foods.

Notes:

- 1) Path change to relevant location required in 'donanalysis.do'
- 2) All figures (including temporary components) and log file saved to 'Datafortheweb' file during run.
