# Supplementary figures and images for: Dynamic Inconsistency in Food Choice: Experimental Evidence from Two Food Deserts
Source: Oxford University Press journal article supplement (doi:10.1093/restud/rdz030), 2019-05-16

Panel A: Welfare Effects of Inconsistency

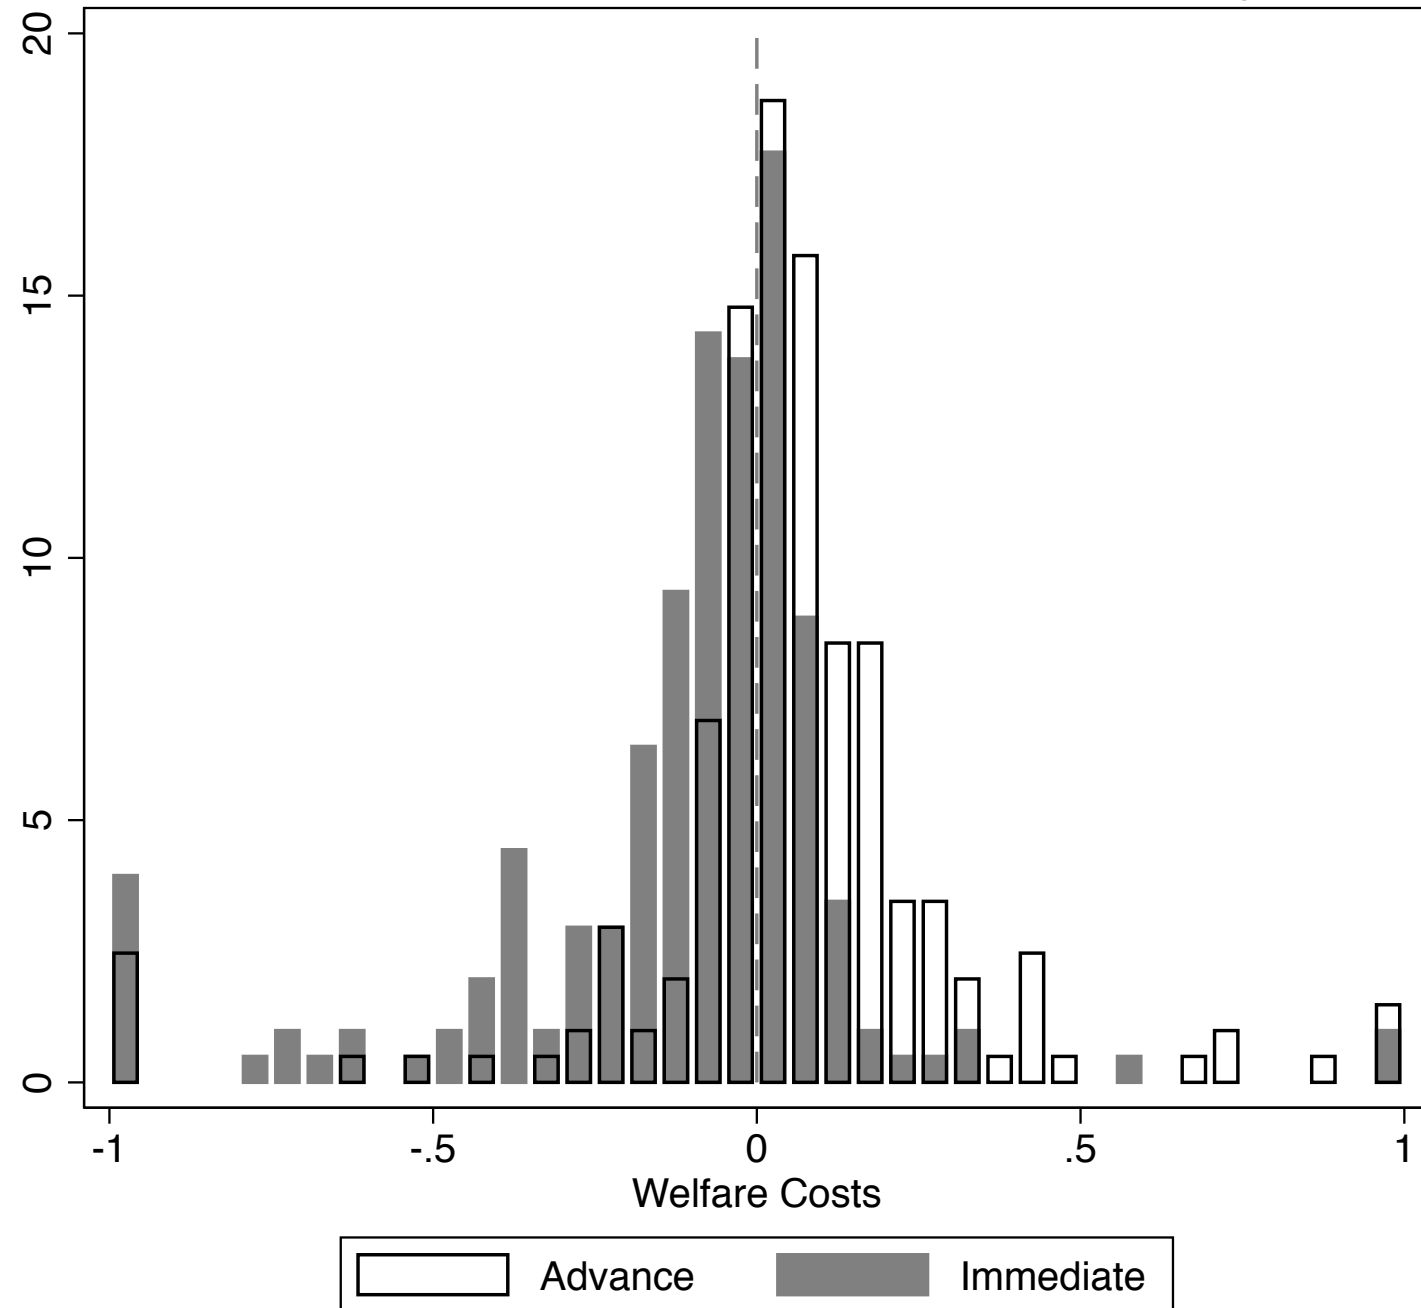

Panel B: Advance-Immediate Agreement

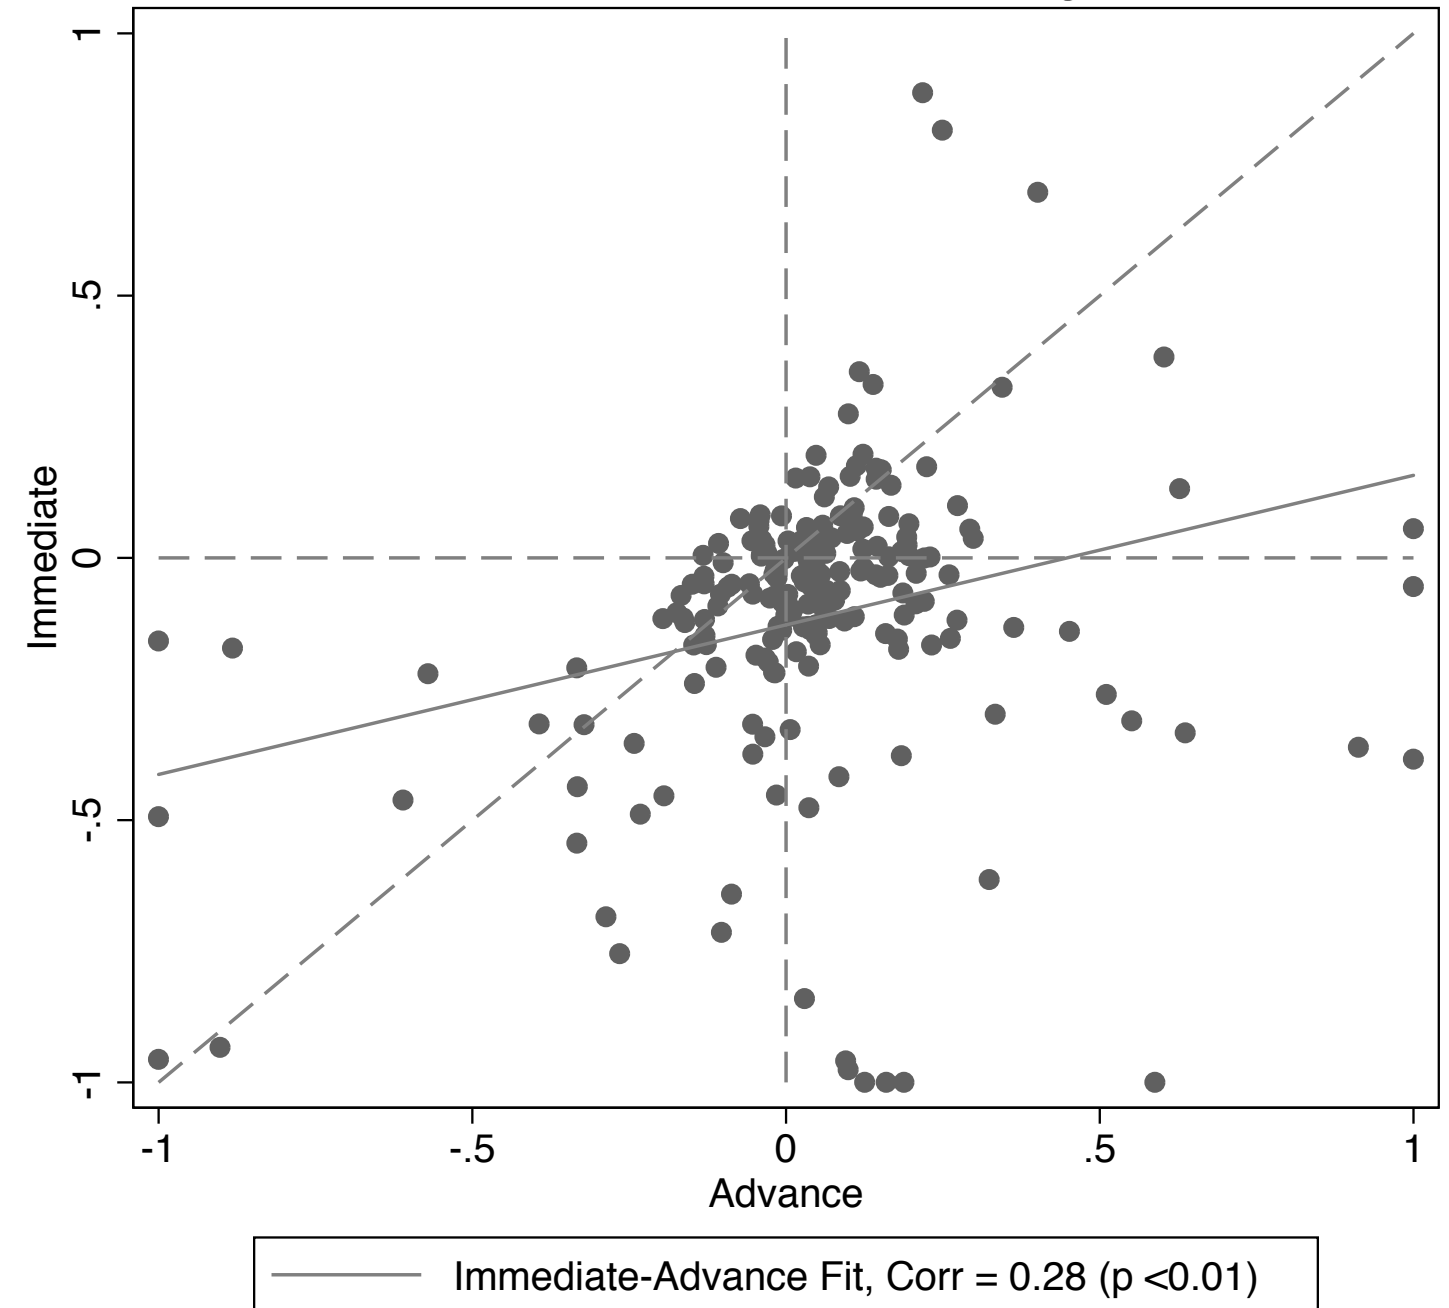

Supplement: rdz030_supplementary_data.zip [file rdz030_supplementary_data.zip]

## Panel A: Chicago

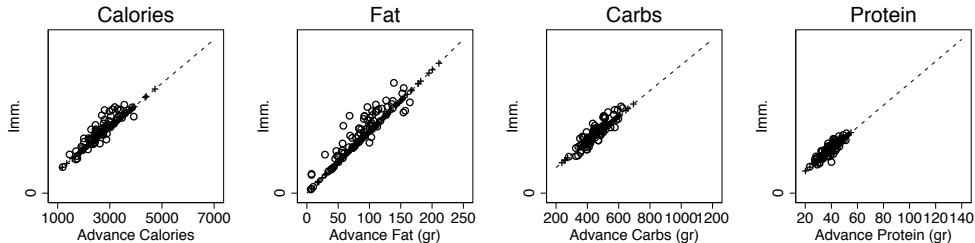

## Panel B: Los Angeles

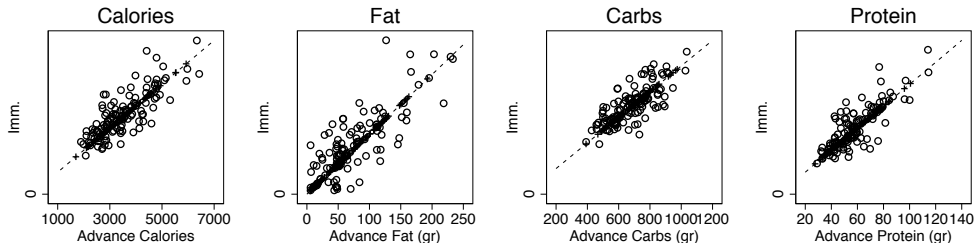

○ Inconsistent    + Consistent

Supplement: rdz030_supplementary_data.zip [file rdz030_supplementary_data.zip]

Panel A: Welfare Effects of Inconsistency

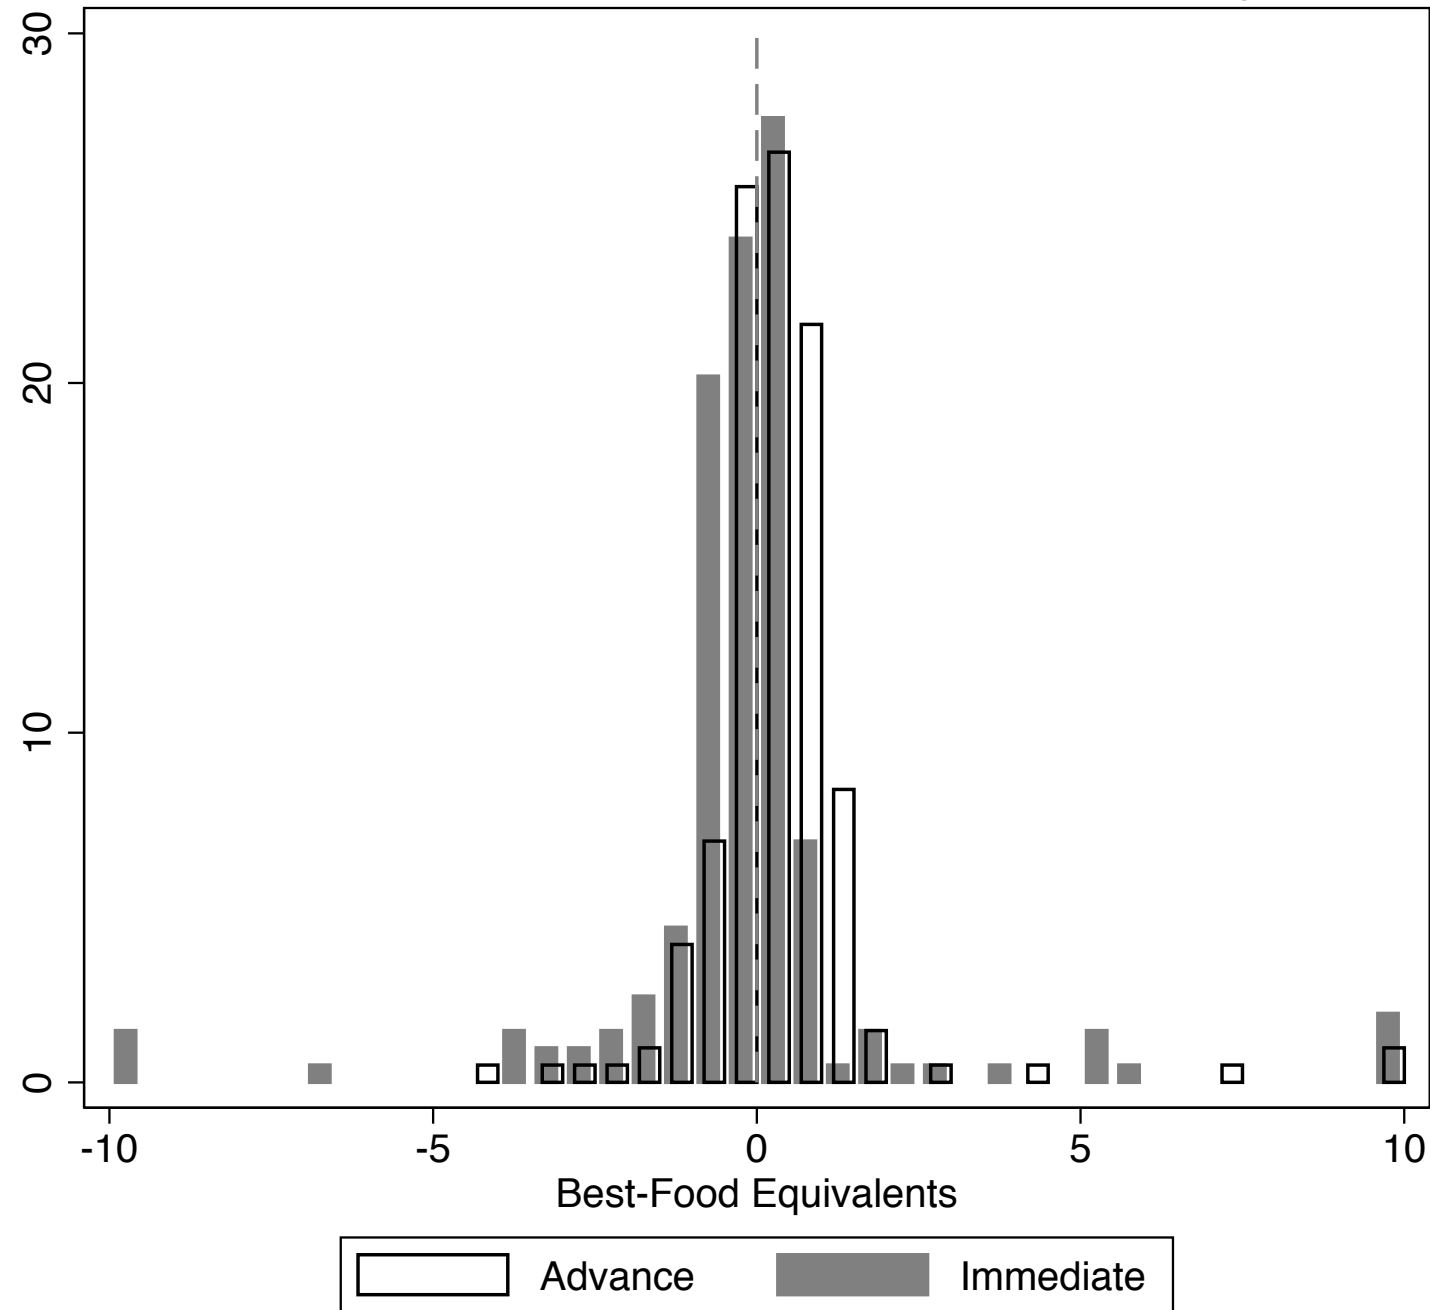

Panel B: Advance-Immediate Agreement

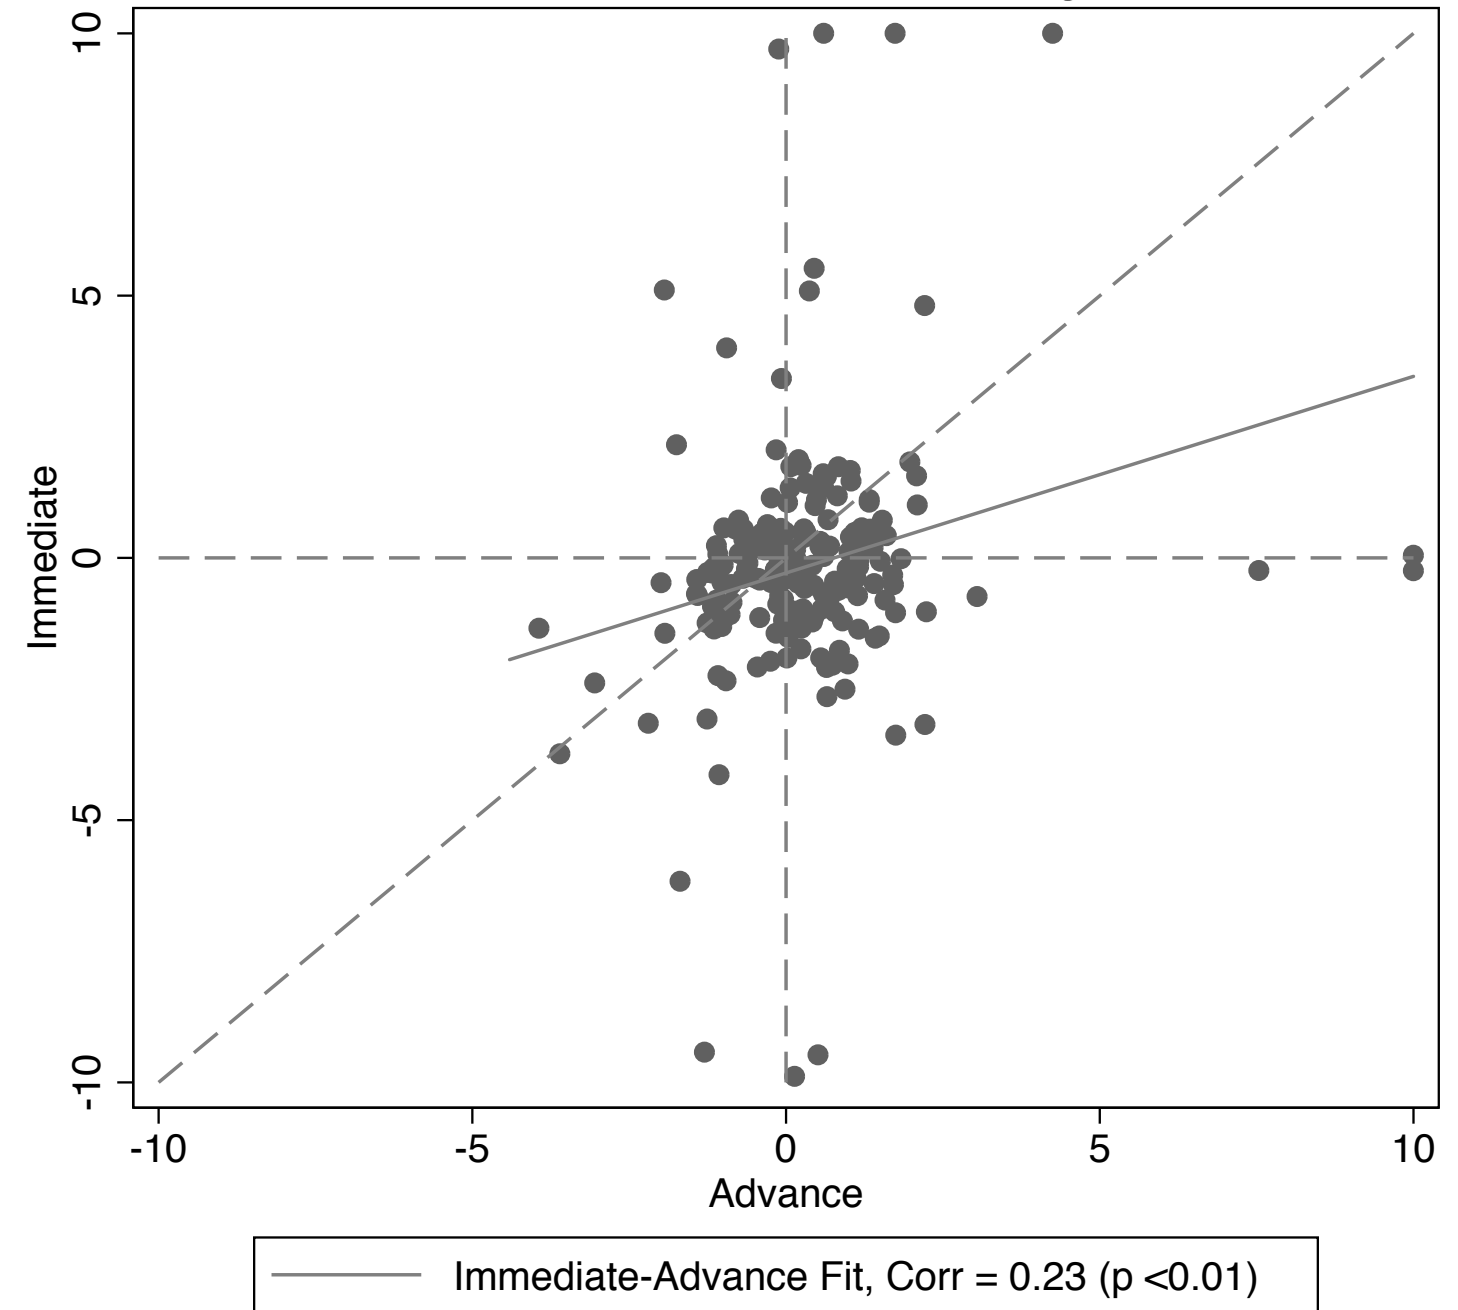

Supplement: rdz030_supplementary_data.zip [file rdz030_supplementary_data.zip]

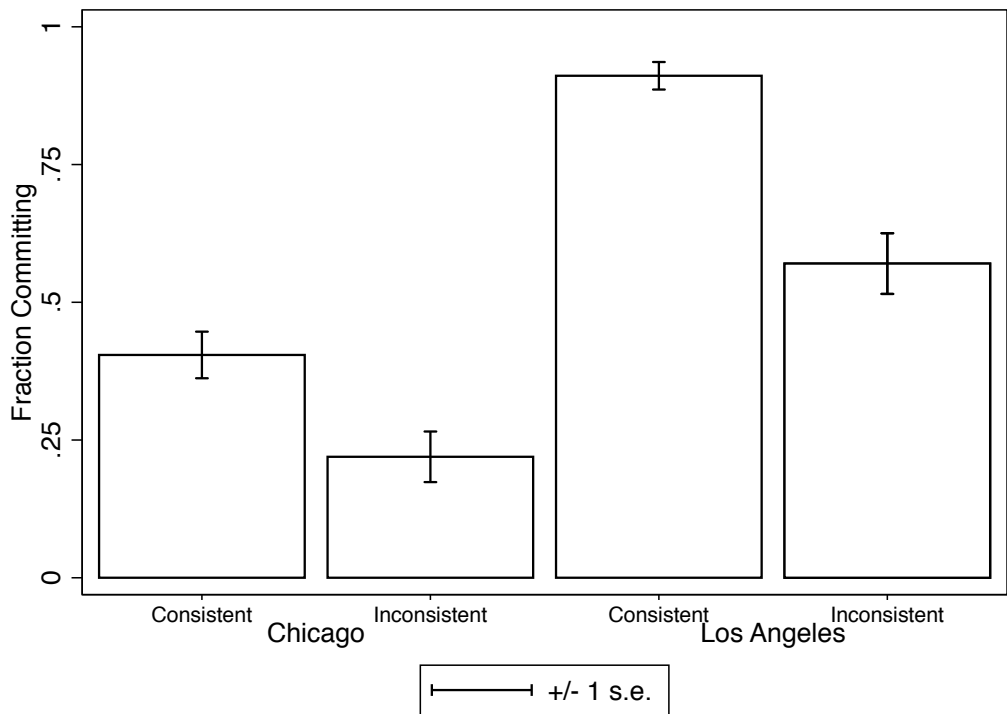

Supplement: rdz030_supplementary_data.zip [file rdz030_supplementary_data.zip]

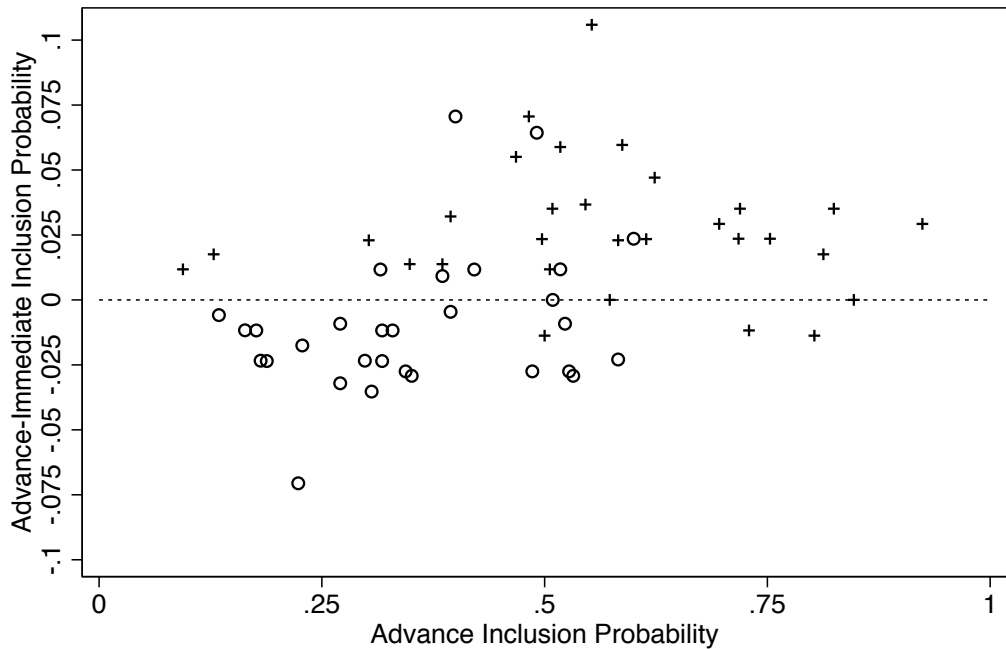

+ Fruits and Vegetables      o Snacks and Sweets

Supplement: rdz030_supplementary_data.zip [file rdz030_supplementary_data.zip]

Panel A:  
Offered Commitment

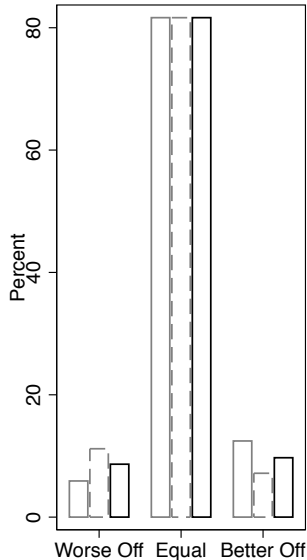

Panel B:  
Mandated Advance

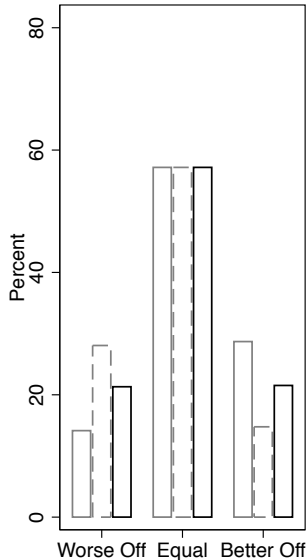

Panel C:  
Tailored Mandate

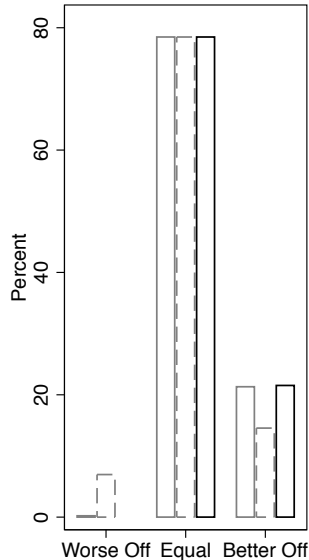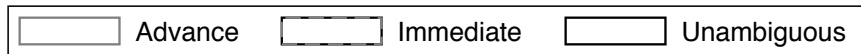

Supplement: rdz030_supplementary_data.zip [file rdz030_supplementary_data.zip]

Panel A: Unambiguous Welfare Measure

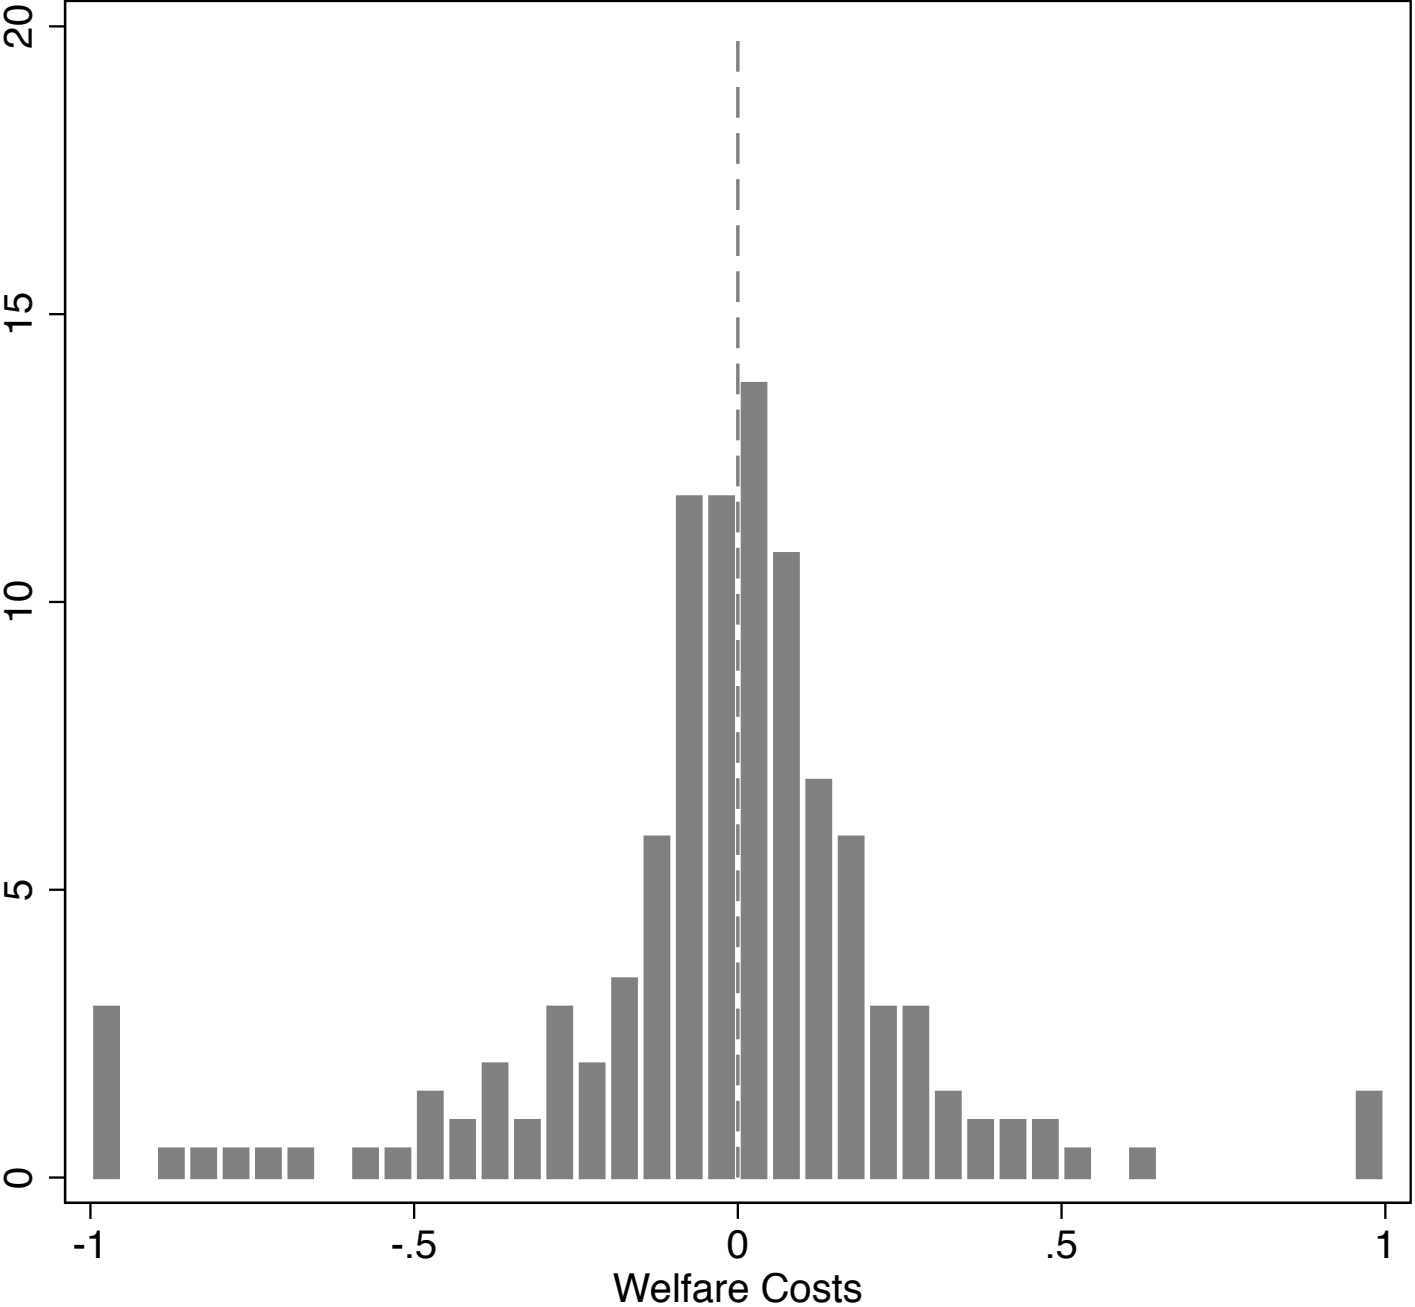

Panel B: Agreement with Unambiguous

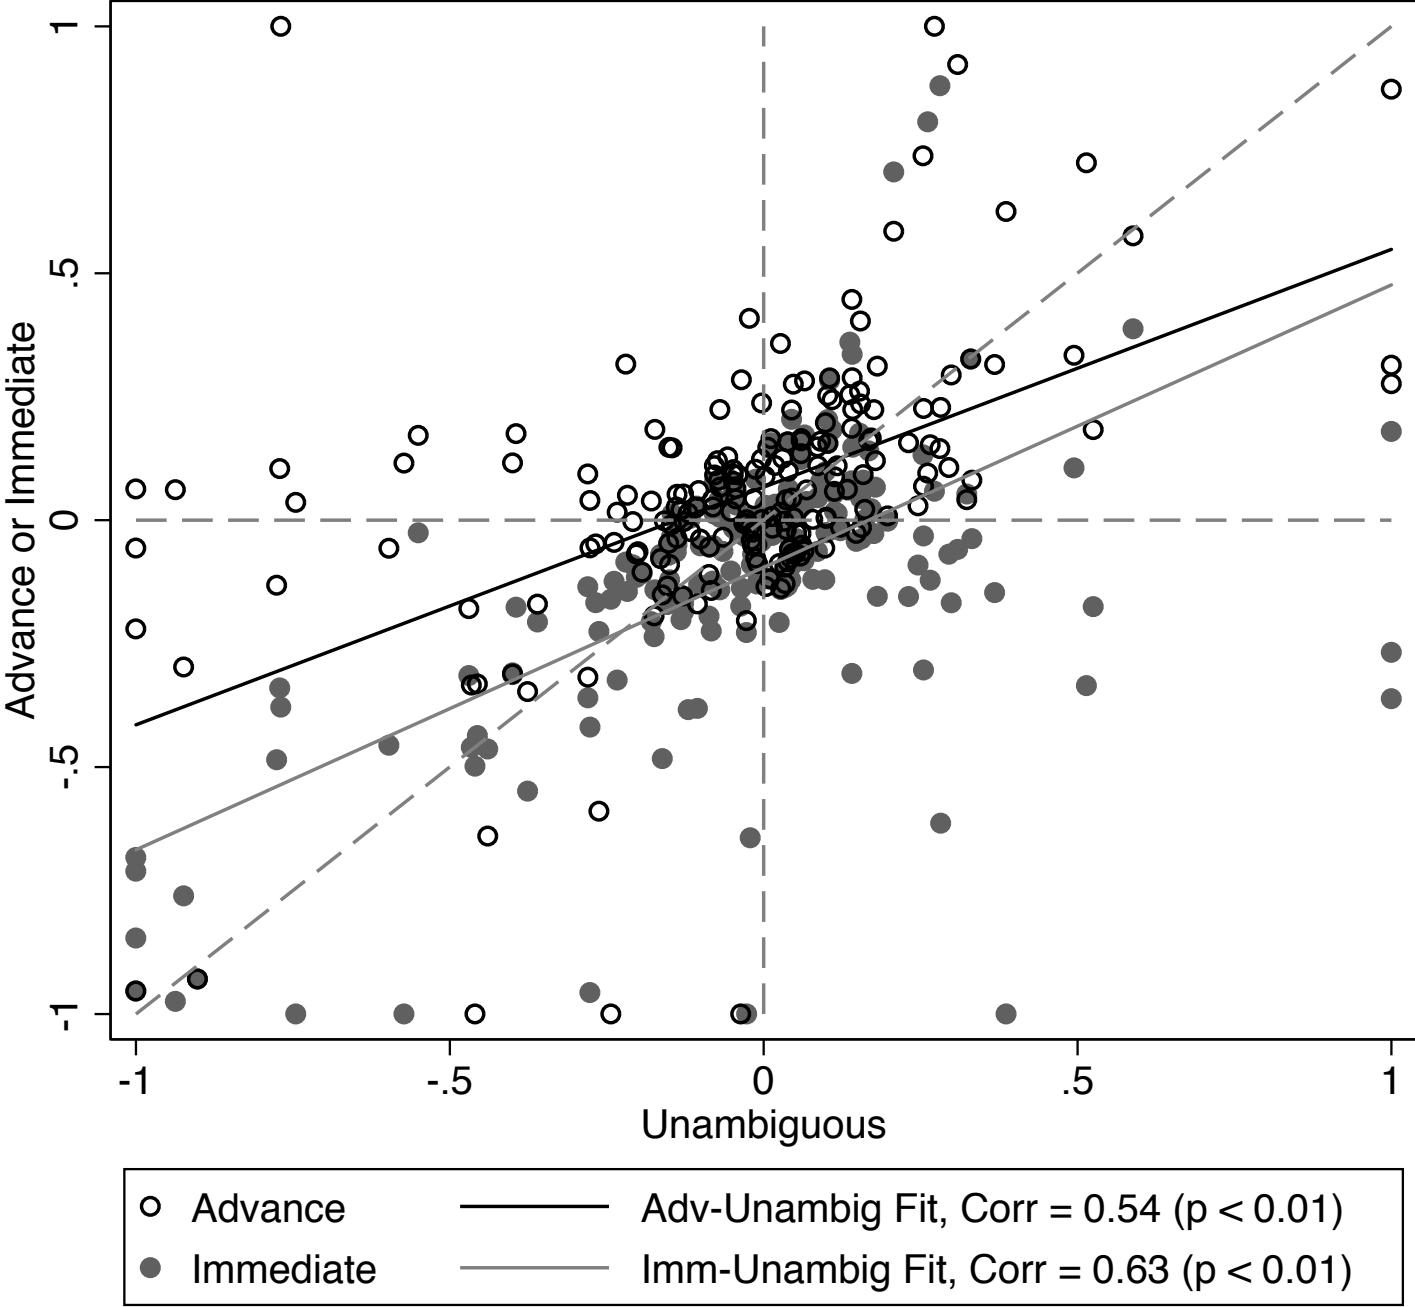

Supplement: rdz030_supplementary_data.zip [file rdz030_supplementary_data.zip]
